# Supplementary material for: [Retracted] Chrysophanol Ameliorates Hemin‐Induced Oxidative Stress and Endoplasmic Reticulum Stress by Regulating MicroRNA‐320‐5p/Wnt3a Pathway in HT22 Cells
Source: Hindawi journal article supplement (doi:10.1155/2022/9399658), 2022-01-01
Supplement: f1 [file 9399658.f1.zip]

Archive with 8 entries (8 files):
- Figure S1.pdf
- Figure S2.pdf
- Figure S3.pdf
- Figure S4.pdf
- Figure S5.pdf
- Figure S6.pdf
- Figure S7.pdf
- Supplementary.docx
