# Supplementary material for: [Retracted] Chrysophanol Ameliorates Hemin‐Induced Oxidative Stress and Endoplasmic Reticulum Stress by Regulating MicroRNA‐320‐5p/Wnt3a Pathway in HT22 Cells
Source: Hindawi journal article supplement (doi:10.1155/2022/9399658), 2022-01-01
Supplement: f1 [file 9399658.f1.zip › Figure S1.pdf]

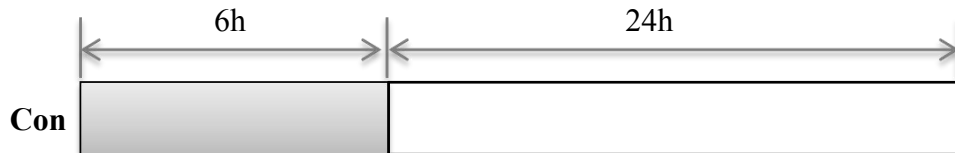

Adding equal volume solvent

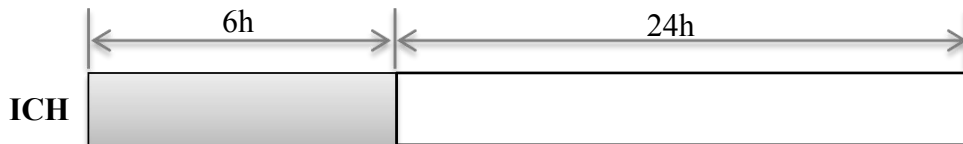

Adding hemin (20 $\mu$ M)

Adding equal volume solvent

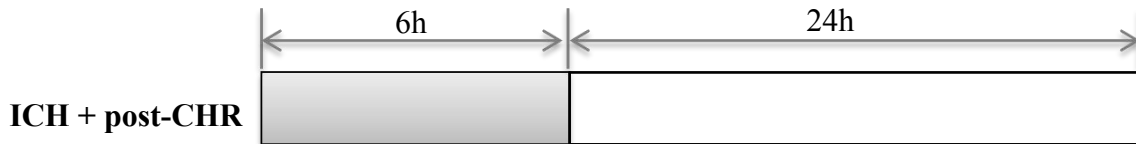

Adding hemin (20 $\mu$ M)

Adding concentrations of CHR (10 $\mu$ M)
