# Supplementary material for: [Retracted] Chrysophanol Ameliorates Hemin‐Induced Oxidative Stress and Endoplasmic Reticulum Stress by Regulating MicroRNA‐320‐5p/Wnt3a Pathway in HT22 Cells
Source: Hindawi journal article supplement (doi:10.1155/2022/9399658), 2022-01-01
Supplement: f1 [file 9399658.f1.zip › Supplementary.docx]

**Supplementary Materials**
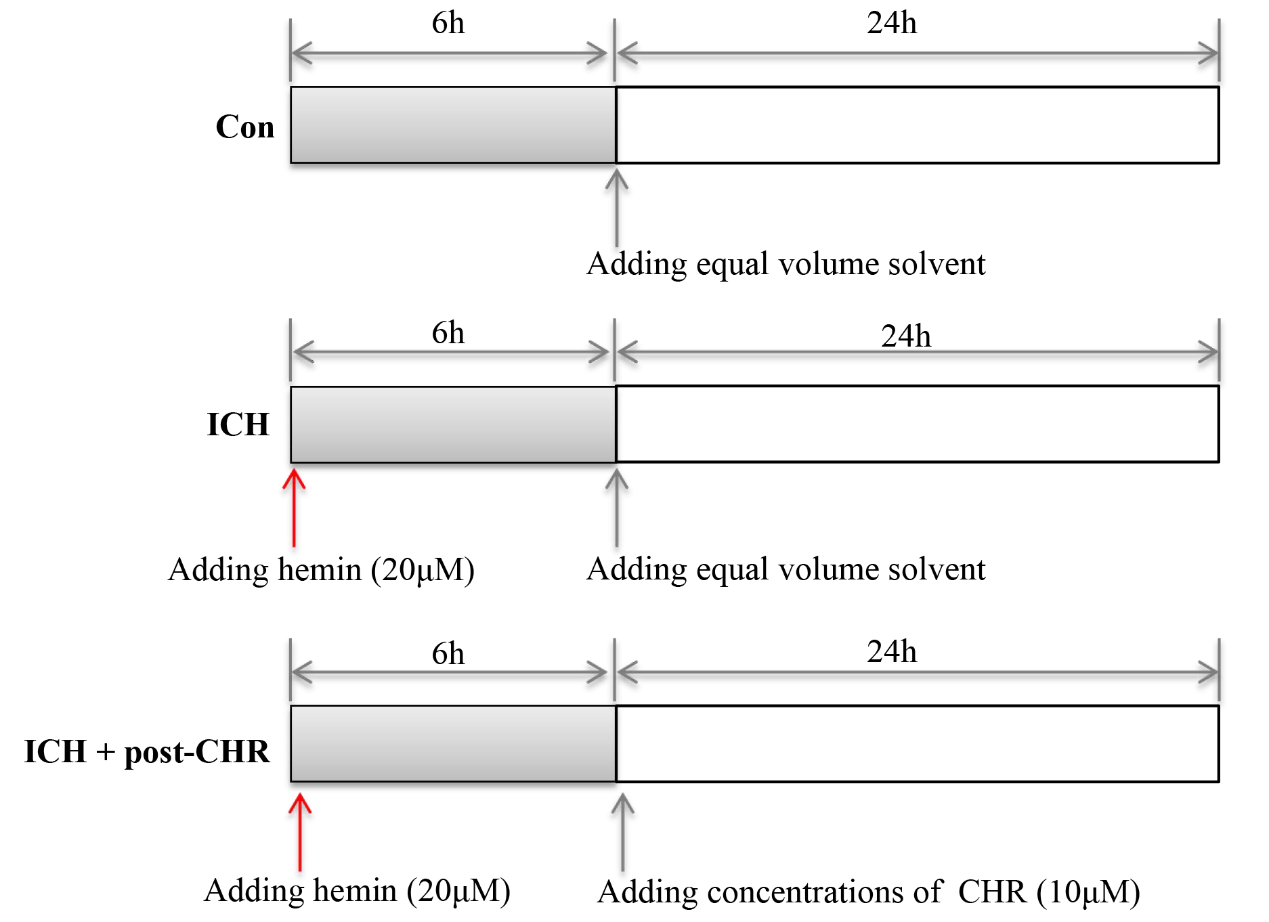


**Figure S1 Diagram showing the timeline of the chrysophanol (CHR) post-treatment process conducted using hemin-induced HT22 cells.**

**
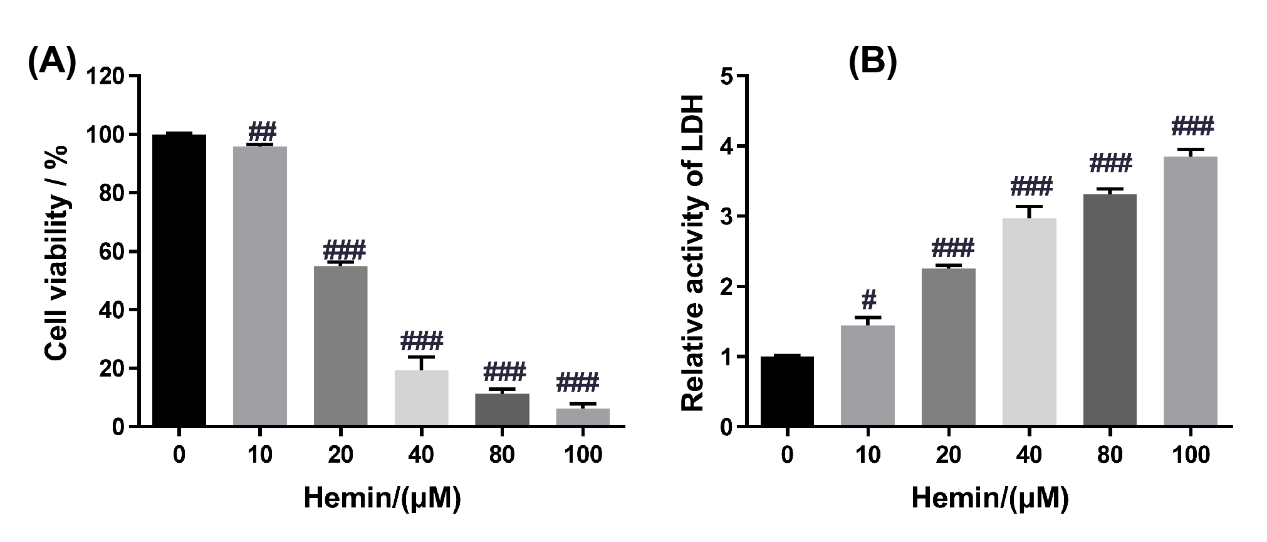
**

**Figure S2 Effects of Hemin on HT22 cells.** **(A)** CCK-8 assay was performed to determine the viability of the HT22 cells treated with hemin (concentrations used 0, 10, 20, 40, 80, and 100 μM).*N.S.p* > 0.05, ****p* < 0.001.N = 3. **(B)** LDH cytotoxicity assay was performed to determine the extent of LDH release achieved in HT22 cells following treatment with hemin (concentrations used: 0, 10, 20, 40, 80, and 100 μM). *N.S.p* > 0.05, ****p* < 0.001. N = 3.

**
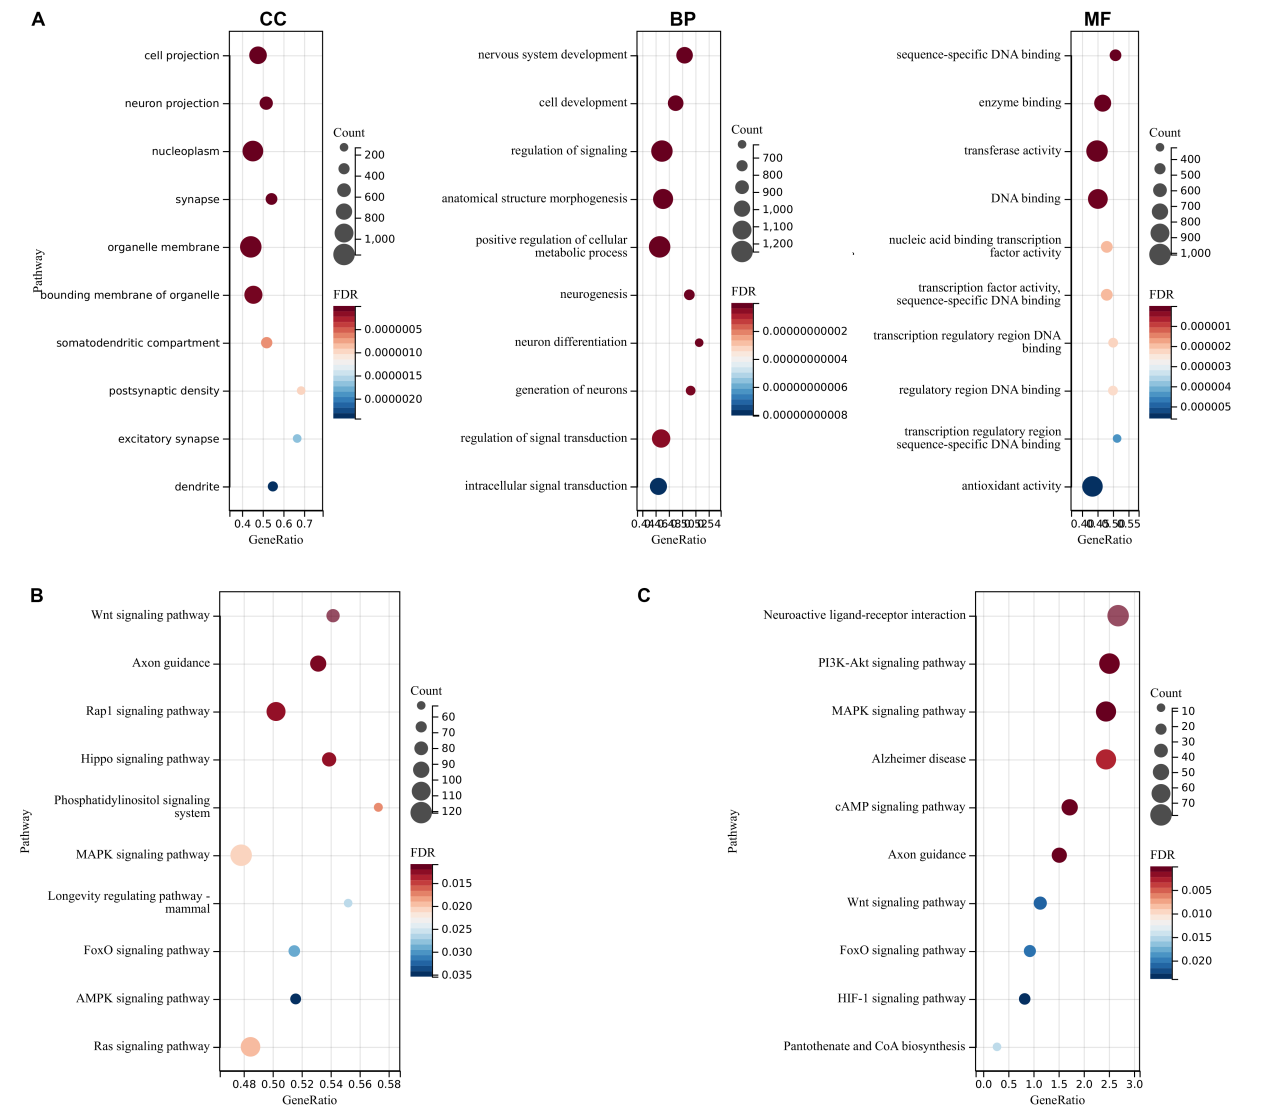
Figure S3 KEGG and GO analysis of differential miRNA and potential binding target genes of Mir-320. (A) GO analysis of differential miRNA. (B) KEGG analysis of differential miRNA. (C) KEGG analysis of potential binding target genes of miR-320-5p.**


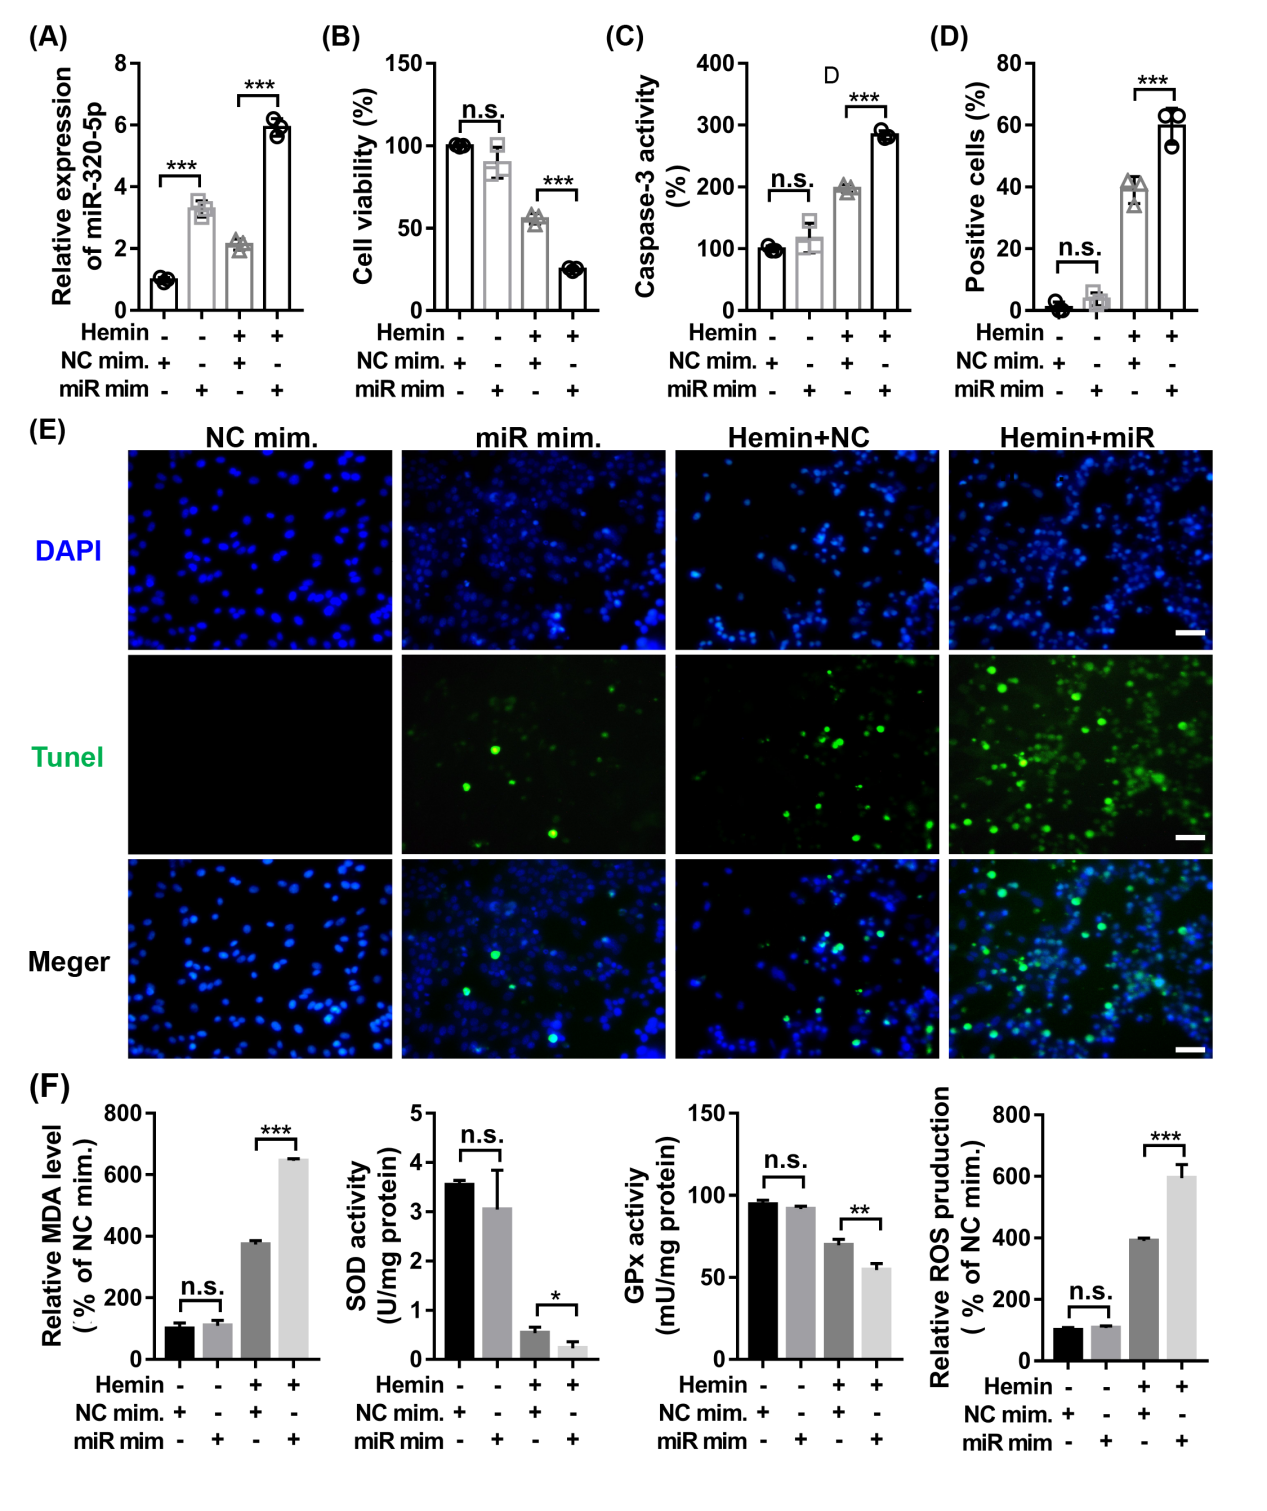


**Figure S4 Overexpression of miR-320-5p** **decreased the viability of the HT22 cells and promoted apoptosis in normal or hemin-induced HT22 cell injury models.** NC mim., negative control mimics; miR mim., miR-320-5p mimics. **(A)** Level of expression of miR-320-5p was studied using normal or hemin-induced HT22 cells in the presence of miR-320-5p mimics using the RT-PCR technique. ****p* < 0.001. N = 3. **(B)** Cell viability was studied using normal or hemin-induced HT22 cells in the presence of miR-320-5p mimics (treatment time: 24 h) by conducting the CCK-8 assays. *N.S.p* > 0.05, ****p* < 0.001. N = 3. **(C)** Caspase-3 activity in normal or hemin-induced HT22 cells (20 µM) in the presence of miR-320-5p mimics (treatment time: 24 h) was studied using the caspase-3 activity kit. *N.S.p* > 0.05, ***p* < 0.01, ****p* < 0.001. N = 3. **(D and E)** Apoptosis rate in normal or hemin-induced HT22 cells in the presence of miR-320-5p mimics (treatment time: 24 h) was studied by conducting the TUNEL staining assays. *N.S.p* > 0.05,  **p* < 0.05, ***p* < 0.01. N = 3. **(F)** The change of oxidative stress-related indexes (MDA, SOD, GPx, and ROS) was detected in normal or hemin-induced HT22 cells in the presence of miR-320-5p mimics (treatment time: 24 h). *N.S.p* > 0.05, ***p* < 0.01, ****p* < 0.001. N = 3.


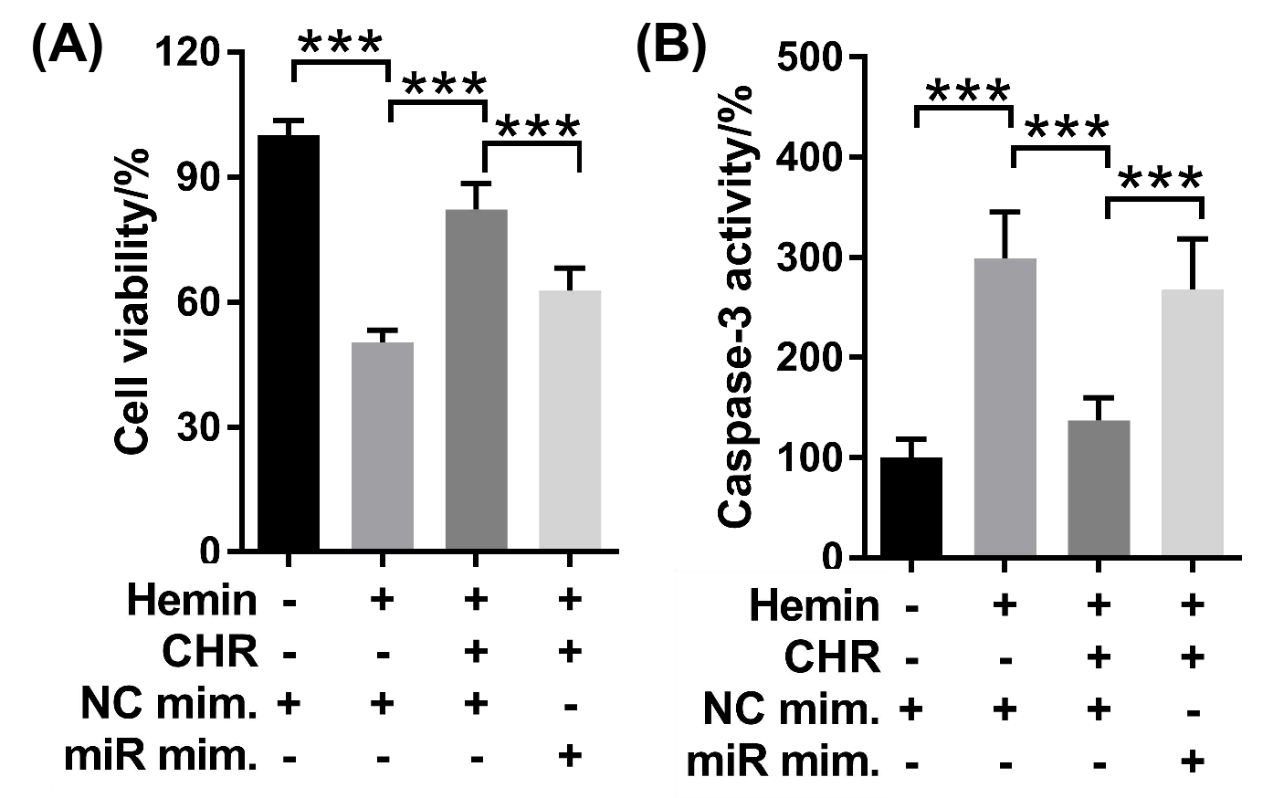


**Figure S5 CHR inhibited HT22 cell viability and apoptosis by down-regulating miR-320-5p in hemin-induced HT22 cell injury models.** NC mim., negative control mimics; miR mim., miR-320-5p mimics. **(A)** Cell viability was studied using hemin-induced HT22 cells in the presence and absence of CHR (10 μM; treatment time: 24 h) or miR-320-5p mimics (treatment time: 24 h) by conducting the CCK-8 assays. ****p* < 0.001. N = 3. **(B)** Caspase-3 activity in hemin-induced HT22 cells (20 µM) in the presence and absence of CHR (10 μM; treatment time: 24 h) or miR-320-5p mimics (treatment time: 24 h) was studied using the caspase-3 activity kit. ****p* < 0.001. N = 3.


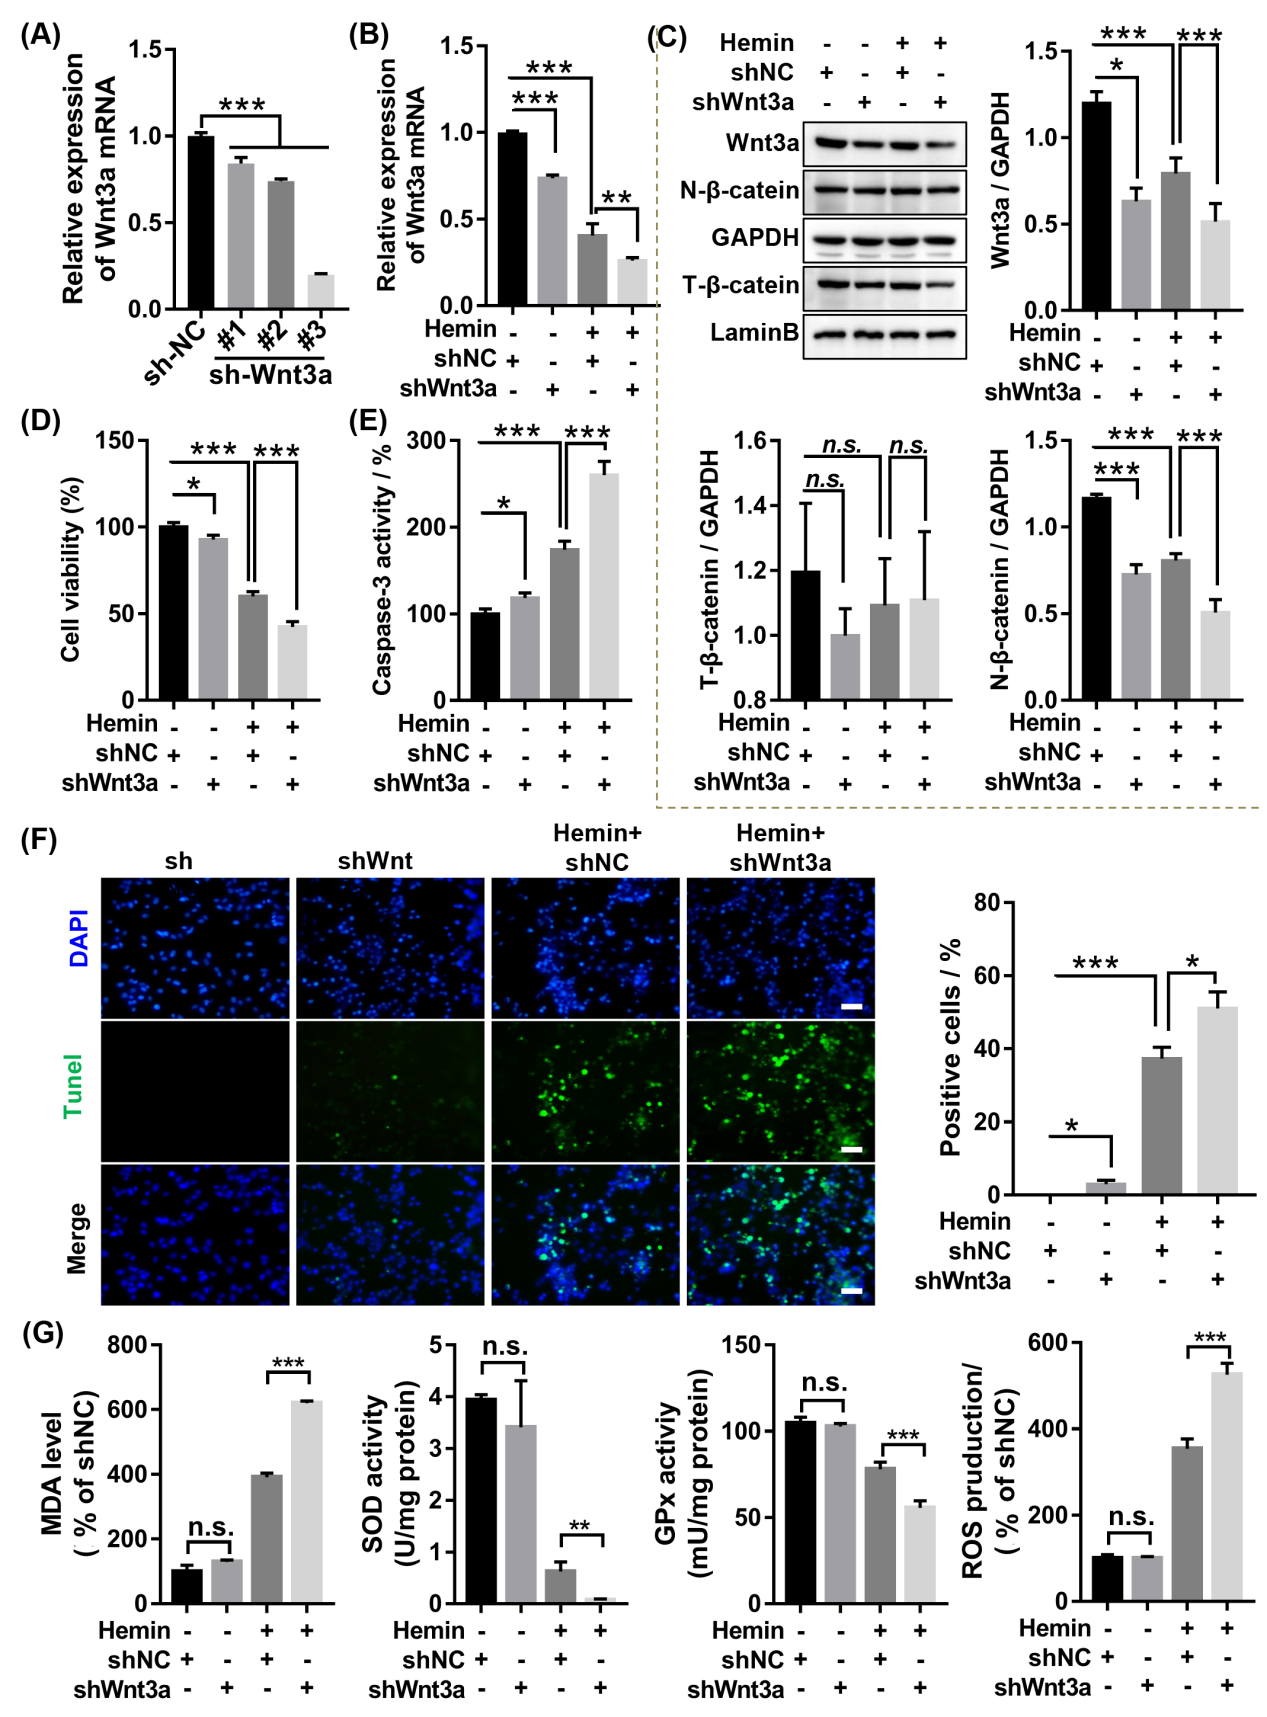


**Figure S6 Downregulation of Wnt3a promoted the apoptosis of HT22 cells and reduced the level of nuclear β-catenin in hemin-induced HT22 cell injury models**

**(A)** HT22 cells were transfected with Wnt3a shRNAs and the corresponding negative controls. The level of Wnt3a mRNA expression was analyzed using the RT-PCR. Sh-NC, negative control shRNA; sh-Wnt3a, Wnt3a shRNA. ***p* < 0.01, ****p* < 0.001. N = 3. **(B)** Expression levels ofWnt3a mRNA were analyzed using the RT-PCR technique in hemin-induced HT22 cells (20 µM) with sh-Wnt3a (treatment time: 24 h), ***p* < 0.01, ****p* < 0.001. N = 3. **(C)**Protein expression levels of Wnt3a, total β-catenin, and nuclear β-catenin were analyzed in hemin-induced HT22 cells (20 µM) with sh-Wnt3a (treatment time: 24 h) following the western blot technique. **p* < 0.05, ****p* < 0.001. N = 3. **(D)** Cell viability of the normal or hemin-induced HT22 cells (20 µM) transfected with sh-Wnt3a (treatment time: 24 h) was studied by conducting the CCK-8 assays. **p* < 0.05, ****p* < 0.001. N = 3. **(E)** Caspase-3 activity in normal or hemin-induced HT22 cells transfected with sh-Wnt3a was studied. **p* < 0.05, ****p* < 0.001.N = 3. **(F)** Apoptosis rate in normal or hemin-induced HT22 cells (20 µM) transfected with sh-Wnt3a (treatment time: 24 h) was studied by conducting the TUNEL staining assays. **p* < 0.05, ****p* < 0.001.N = 3. **(G)** The change of oxidative stress-related indexes (MDA, SOD, GPx, and ROS) was detected in normal or hemin-induced HT22 cells (20 µM) transfected with sh-Wnt3a (treatment time: 24 h). **p* < 0.05, ****p* < 0.001.N = 3.


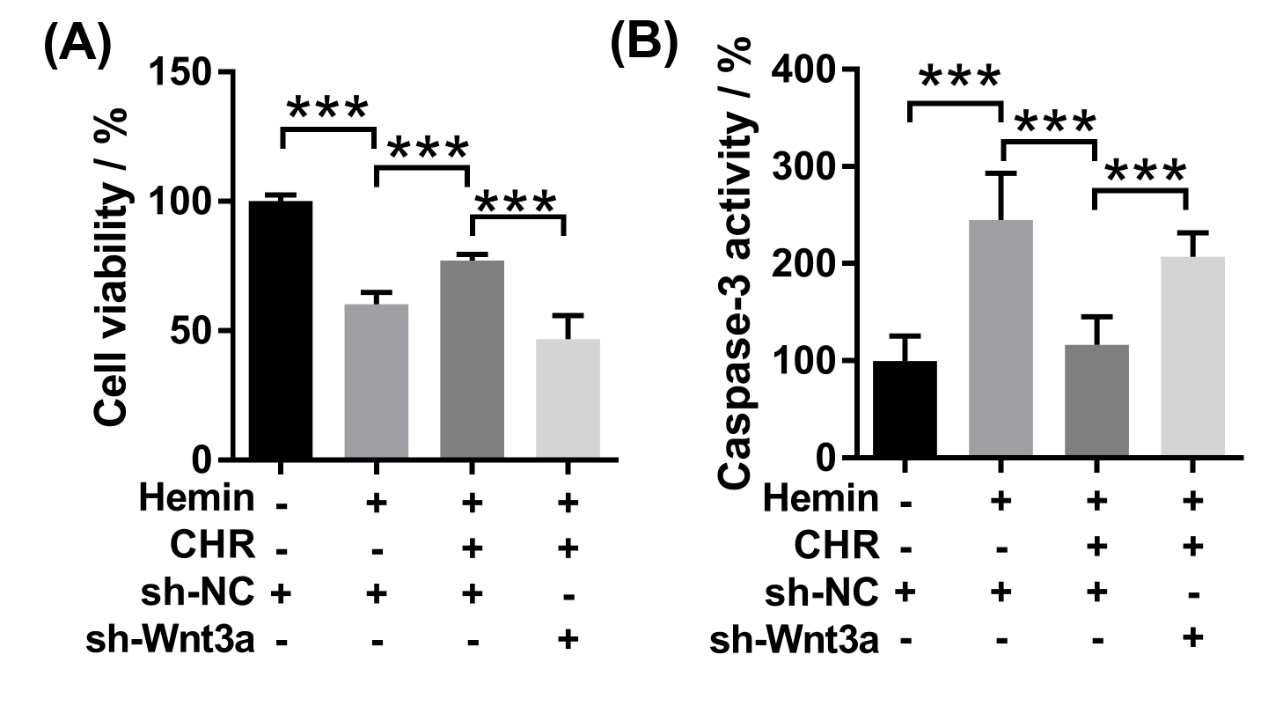


**Figure S7 CHR of HT22 cells promoted cells viability and inhibited the apoptosis by up-regulating Wnt3a in hemin-induced HT22 cell injury models.** Sh-NC, negative control shRNA; sh-Wnt3a, Wnt3a shRNA. **(A)** Cell viability of the hemin-induced HT22 cells (20 µM) with or without CHR (10 μM; treatment time: 24 h) or sh-Wnt3a (treatment time: 24 h) was studied by conducting the CCK-8 assays. ****p* < 0.001. **(B)** Caspase-3 activity in hemin-induced cells with or without CHR or sh-Wnt3a was studied. ****p* < 0.001.

**Table S1. The primer sequence of RNAs and the sequence of miR-320-5p mimics / inhibitor and Wnt3a shRNA**

| **Name** | **Sequence** |
| --- | --- |
| miR-6955-5p | RT:5'-GTCGTATCCAGTGCAGGGTCCGAGGTATTCGCACTGGATACGACTCACCT-3' |
|  | F:5’-GAGGGCCTCAGGACTCAGG-3’ |
| miR-181b-2-3p | RT:5'-GTCGTATCCAGTGCAGGGTCCGAGGTATTCGCACTGGATACGACTTTGCA -3' |
|  | F:5’-CGCGCTCACTGATCAATGAA-3’ |
| miR-9769-3p | RT:5'-GTCGTATCCAGTGCAGGGTCCGAGGTATTCGCACTGGATACGACGGAGGA -3' |
|  | F:5’-CGCGTAGGGTCTGTTCTGTGT-3’ |
| miR-320-5p | RT:5'-GTCGTATCCAGTGCGTGTCGTGGAGTCGGCAATTGCACTGGATACGACGGAAGA -3' |
|  | F: 5’- AAGCCTTCTCTTCCCGGT-3’ |
| miR-323-3p | RT:5'-GTCGTATCCAGTGCGTGTCGTGGAGTCGGCAATTGCACTGGATACGACAGAGGTC -3' |
|  | F: 5’- GCTACGCACATTACACGGTC -3’ |
| miR-760-3p | RT:5'-GTCGTATCCAGTGCGTGTCGTGGAGTCGGCAATTGCACTGGATACGACTCCCCAC -3' |
|  | F: 5’- TATAAATTCGGCTCTGGGTCT-3’ |
| Wnt3a | F: 5′-ACCATGTTCGGGACCTATTCCA-3′ |
|  | R: 5′-GCCTGTAGCATCTCGCTTCCA-3′ |
| U6 | F: 5′-CTCGCTTCGGCAGCACA-3′ |
|  | R: 5′-AACGCTTCACGAATTTGCGT-3′ |
| GAPDH | F:5’-GGTGAAGGTCGGTGTGAACG-3’ |
|  | R:5’-CTCGCTCCTGGAAGATGGTG-3’ |
| miR-320-5p mimics | 5’- GCCUUCUCUUCCCGGUUCUUCC -3’ |
| miR-320-5p inhibitor | 5’- CGGAAGAGAAGGGCCAAGAAGG -3’ |
| Wnt3a shRNA#1 | 5’- CCGGCGCCAGTCACATGCACCTCAACTCGAGTTGAGGTGCATGTGACTGGCGTTTTTG -3’ |
| Wnt3a shRNA#2 | 5’- CCGGCCTCACTTTGAGTTGTATGAACTCGAGTTCATACAACTCAAAGTGAGGTTTTTG -3’ |
| Wnt3a shRNA#3 | 5’- CCGGGCCACGTTACACGTACTTCAACTCGAGTTGAAGTACGTGTAACGTGGCTTTTTG -3’ |

**Table S2. There were significant differences in miRNAs between the hemin-induced HT22 cell injury groups and CHR treatment groups**

| miRNA_ID | log2FC | P-value | updown |
| --- | --- | --- | --- |
| mmu-miR-10b-5p | 1.23 | 4.26E-02 | UP |
| mmu-miR-127-3p | 2.15 | 1.08E-02 | UP |
| mmu-miR-196a-5p | 2.77 | 2.69E-02 | UP |
| mmu-miR-320-5p | 1.75 | 2.01E-03 | UP |
| mmu-miR-323-3p | 3.60 | 4.38E-02 | UP |
| mmu-miR-409-3p | 1.70 | 4.50E-02 | UP |
| mmu-miR-760-3p | 1.27 | 3.70E-02 | UP |
| novel.4 | 1.01 | 4.15E-02 | UP |
| mmu-miR-181b-2-3p | -1.15 | 4.25E-03 | DOWN |
| mmu-miR-6955-5p | -1.30 | 4.17E-02 | DOWN |
| mmu-miR-9769-3p | -1.03 | 2.57E-02 | DOWN |
