# Supplementary figures and images for: [Retracted] Chrysophanol Ameliorates Hemin‐Induced Oxidative Stress and Endoplasmic Reticulum Stress by Regulating MicroRNA‐320‐5p/Wnt3a Pathway in HT22 Cells
Source: Hindawi journal article supplement (doi:10.1155/2022/9399658), 2022-01-01

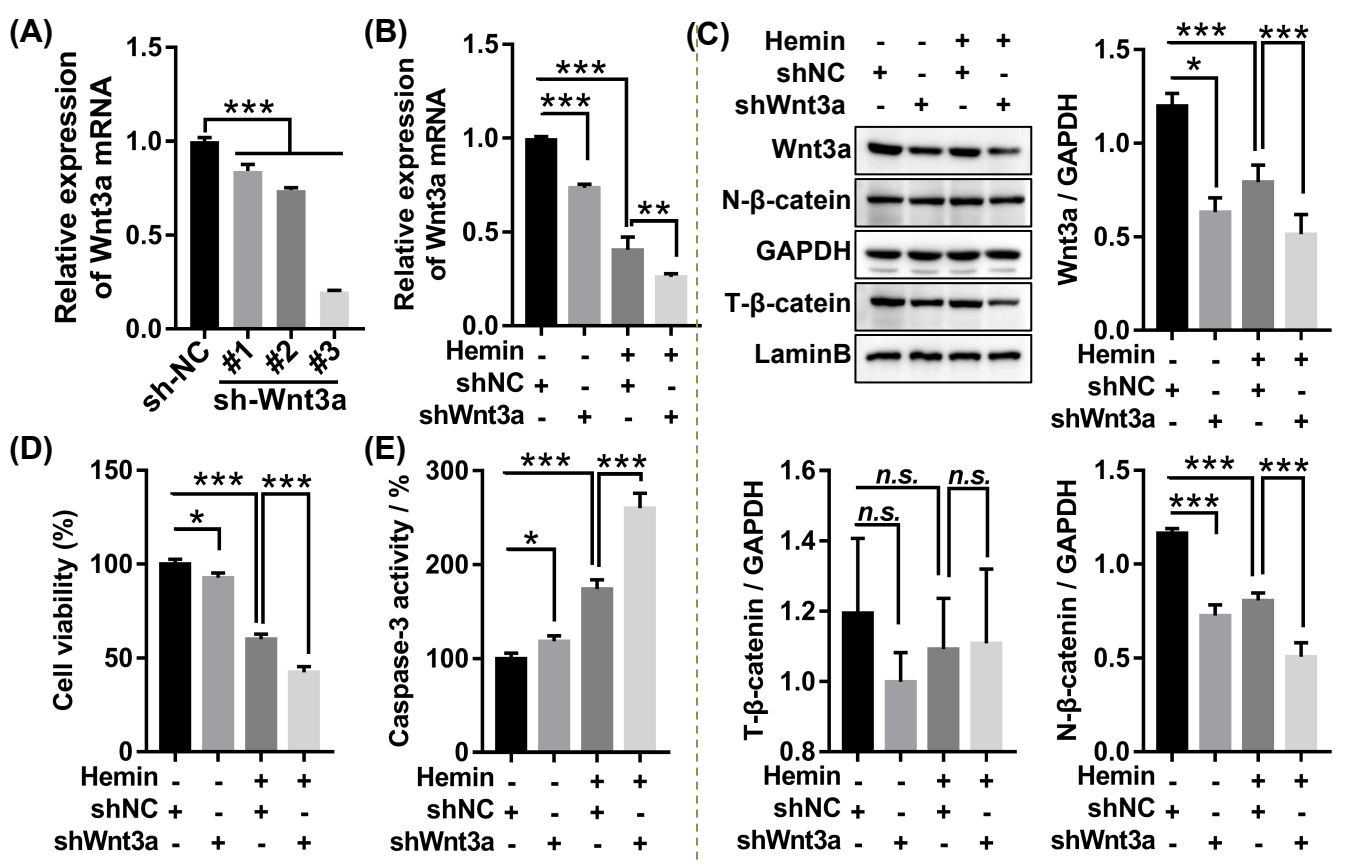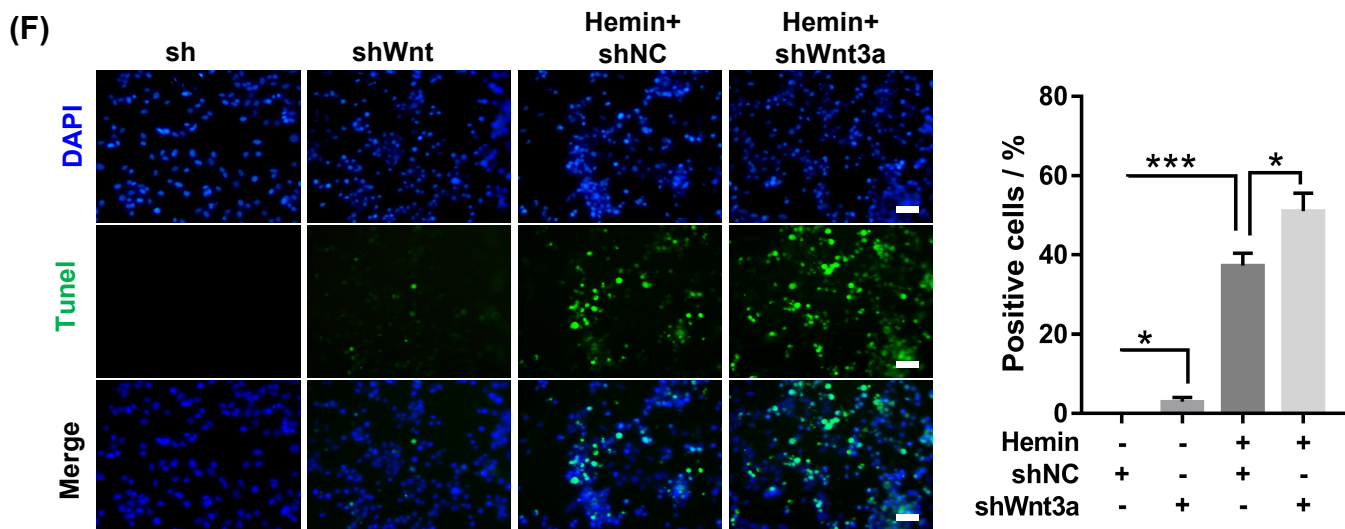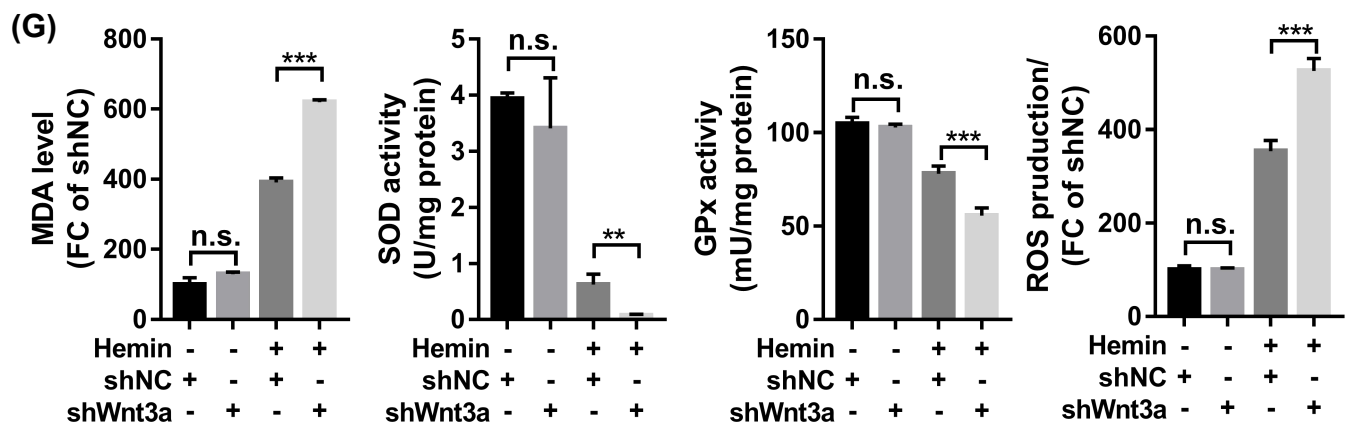

Supplement: f1 [file 9399658.f1.zip]

**(A)**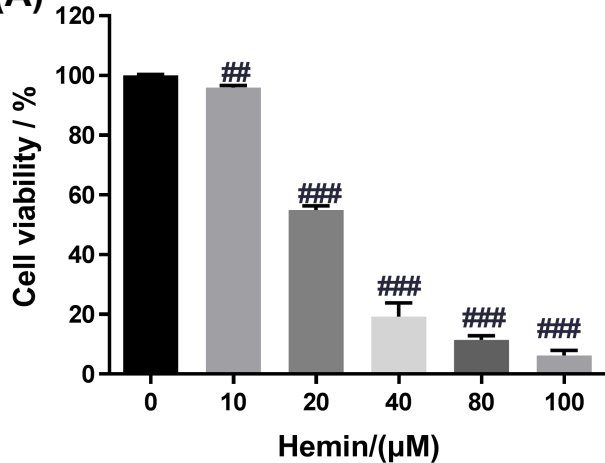**(B)**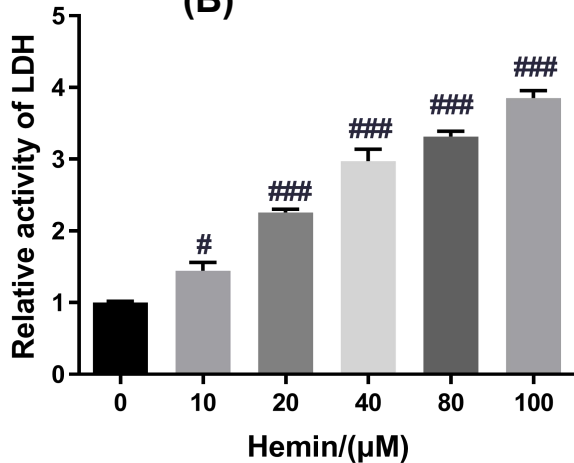

Supplement: f1 [file 9399658.f1.zip]

A

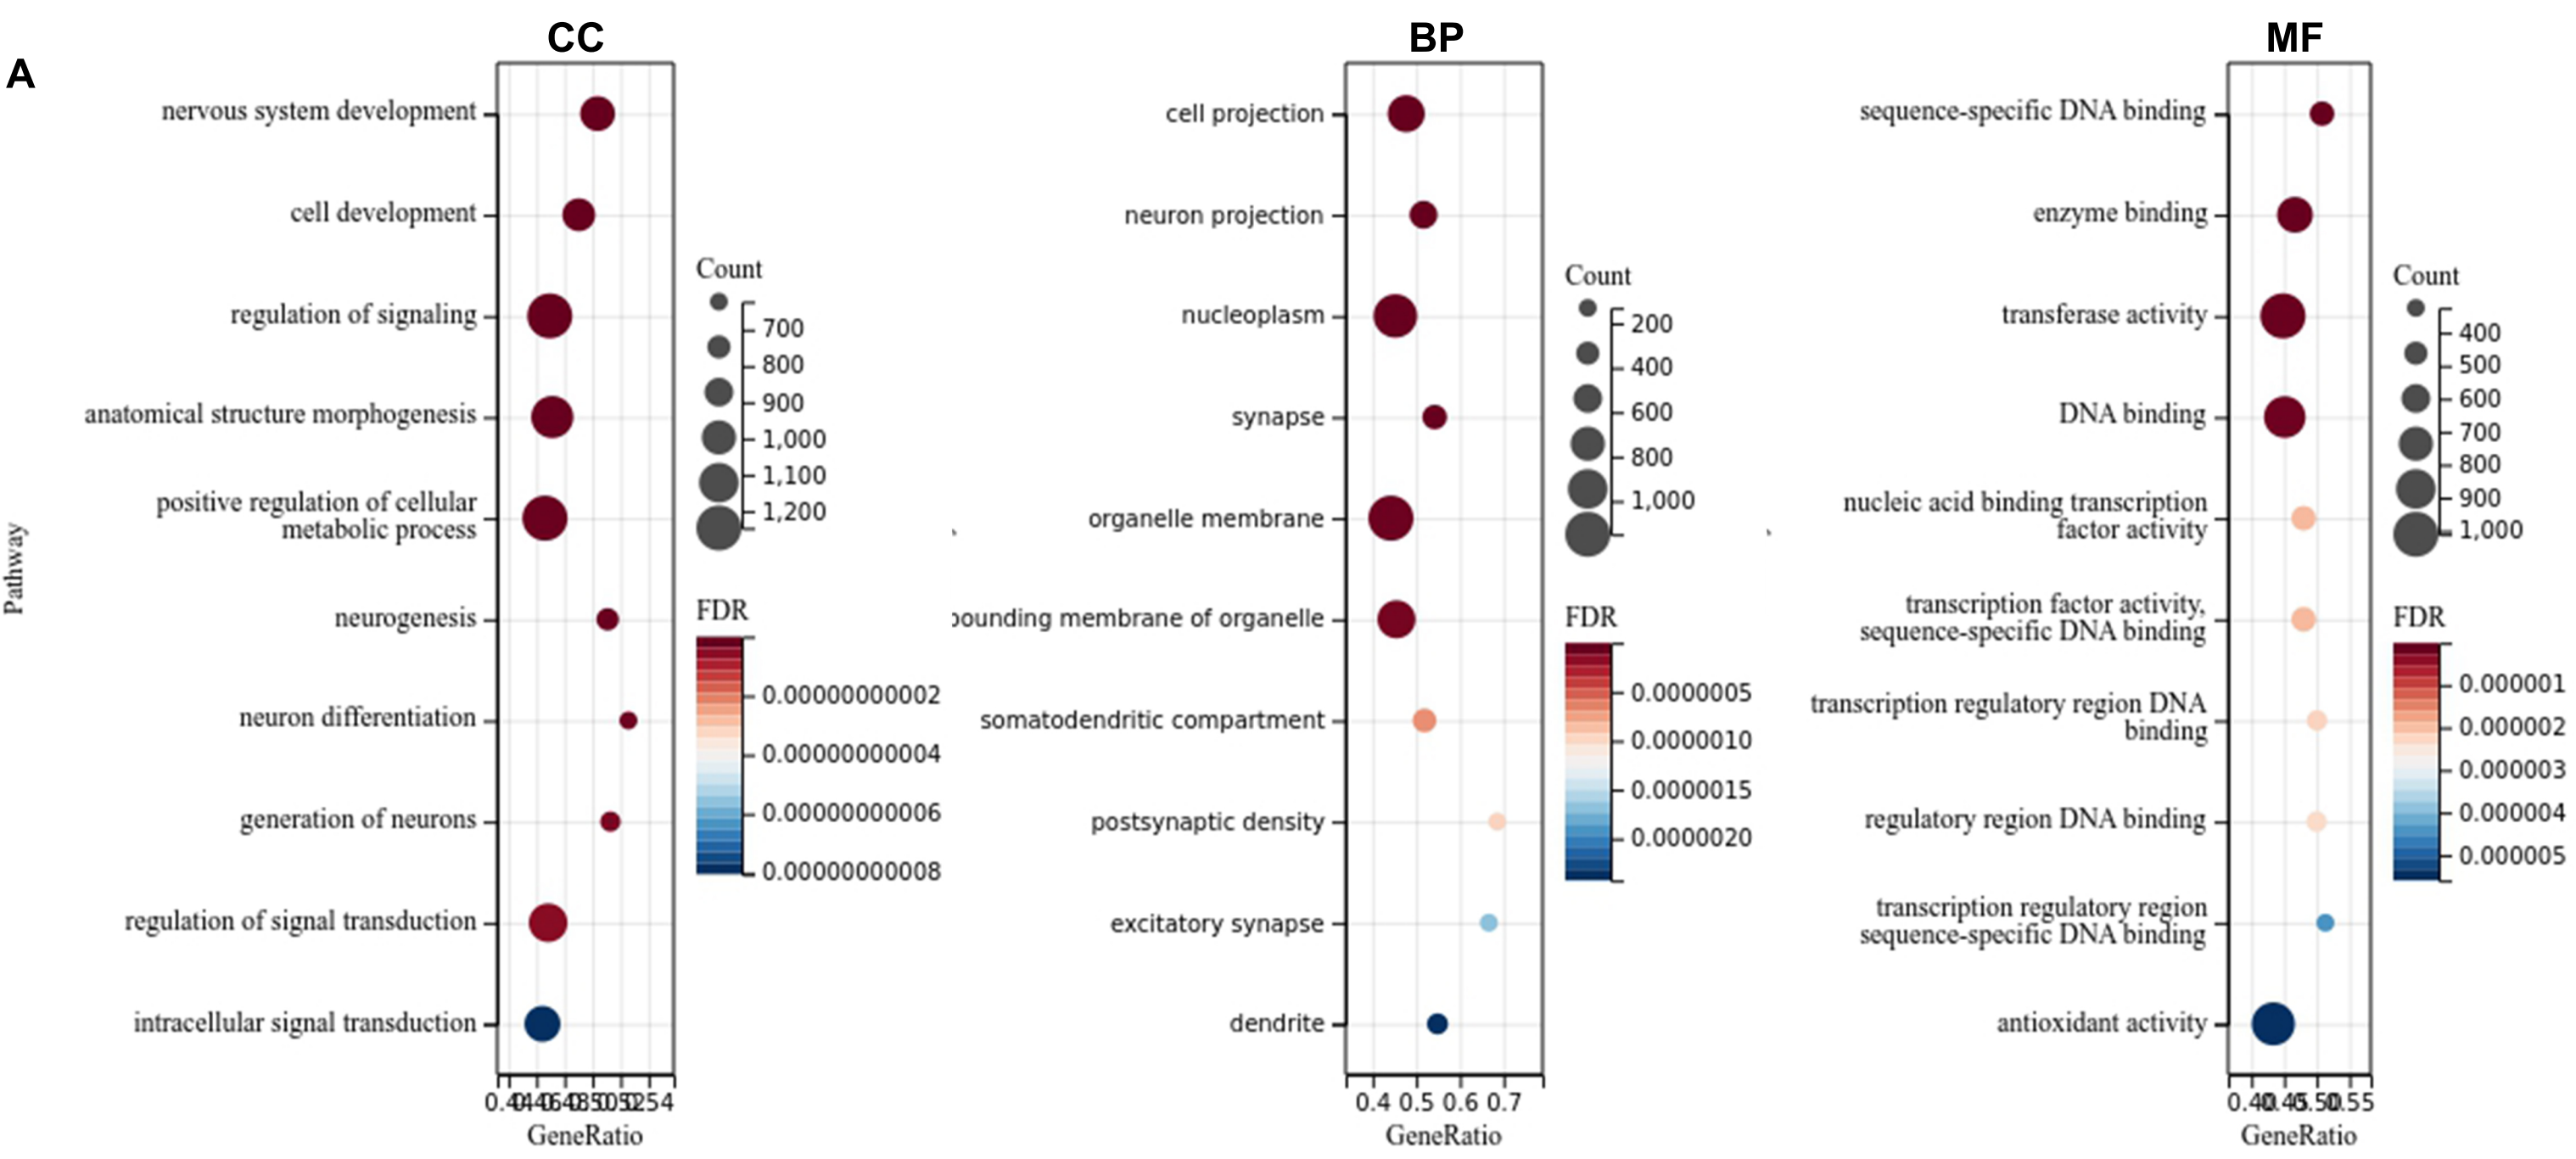

B

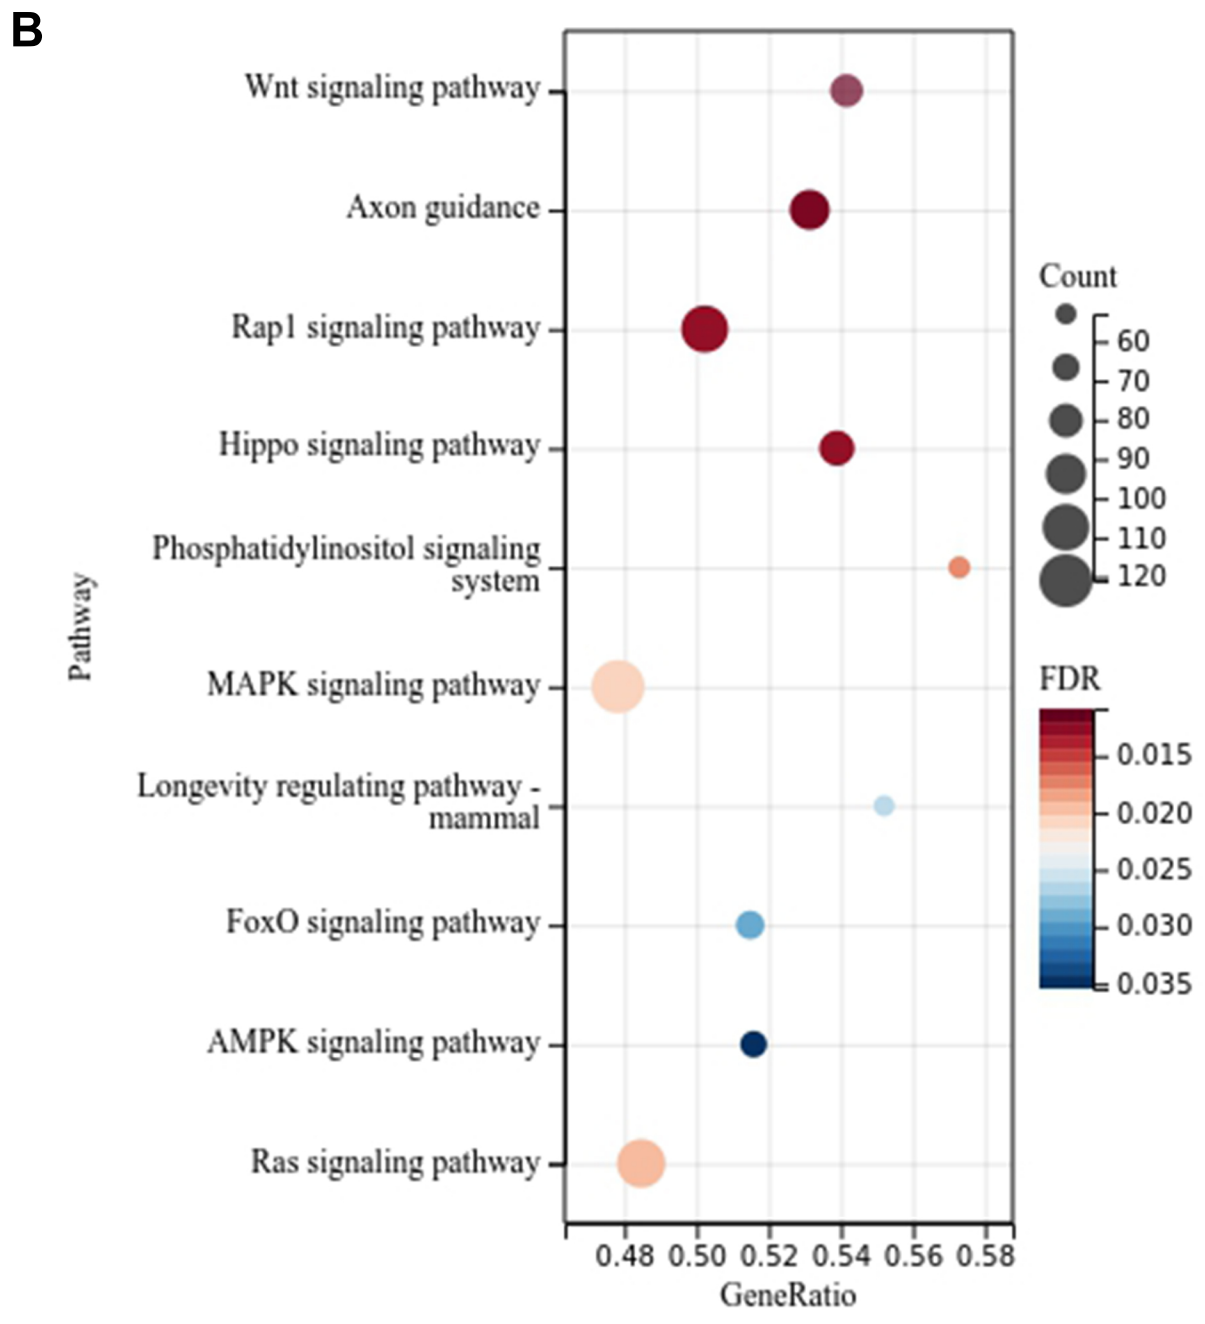

C

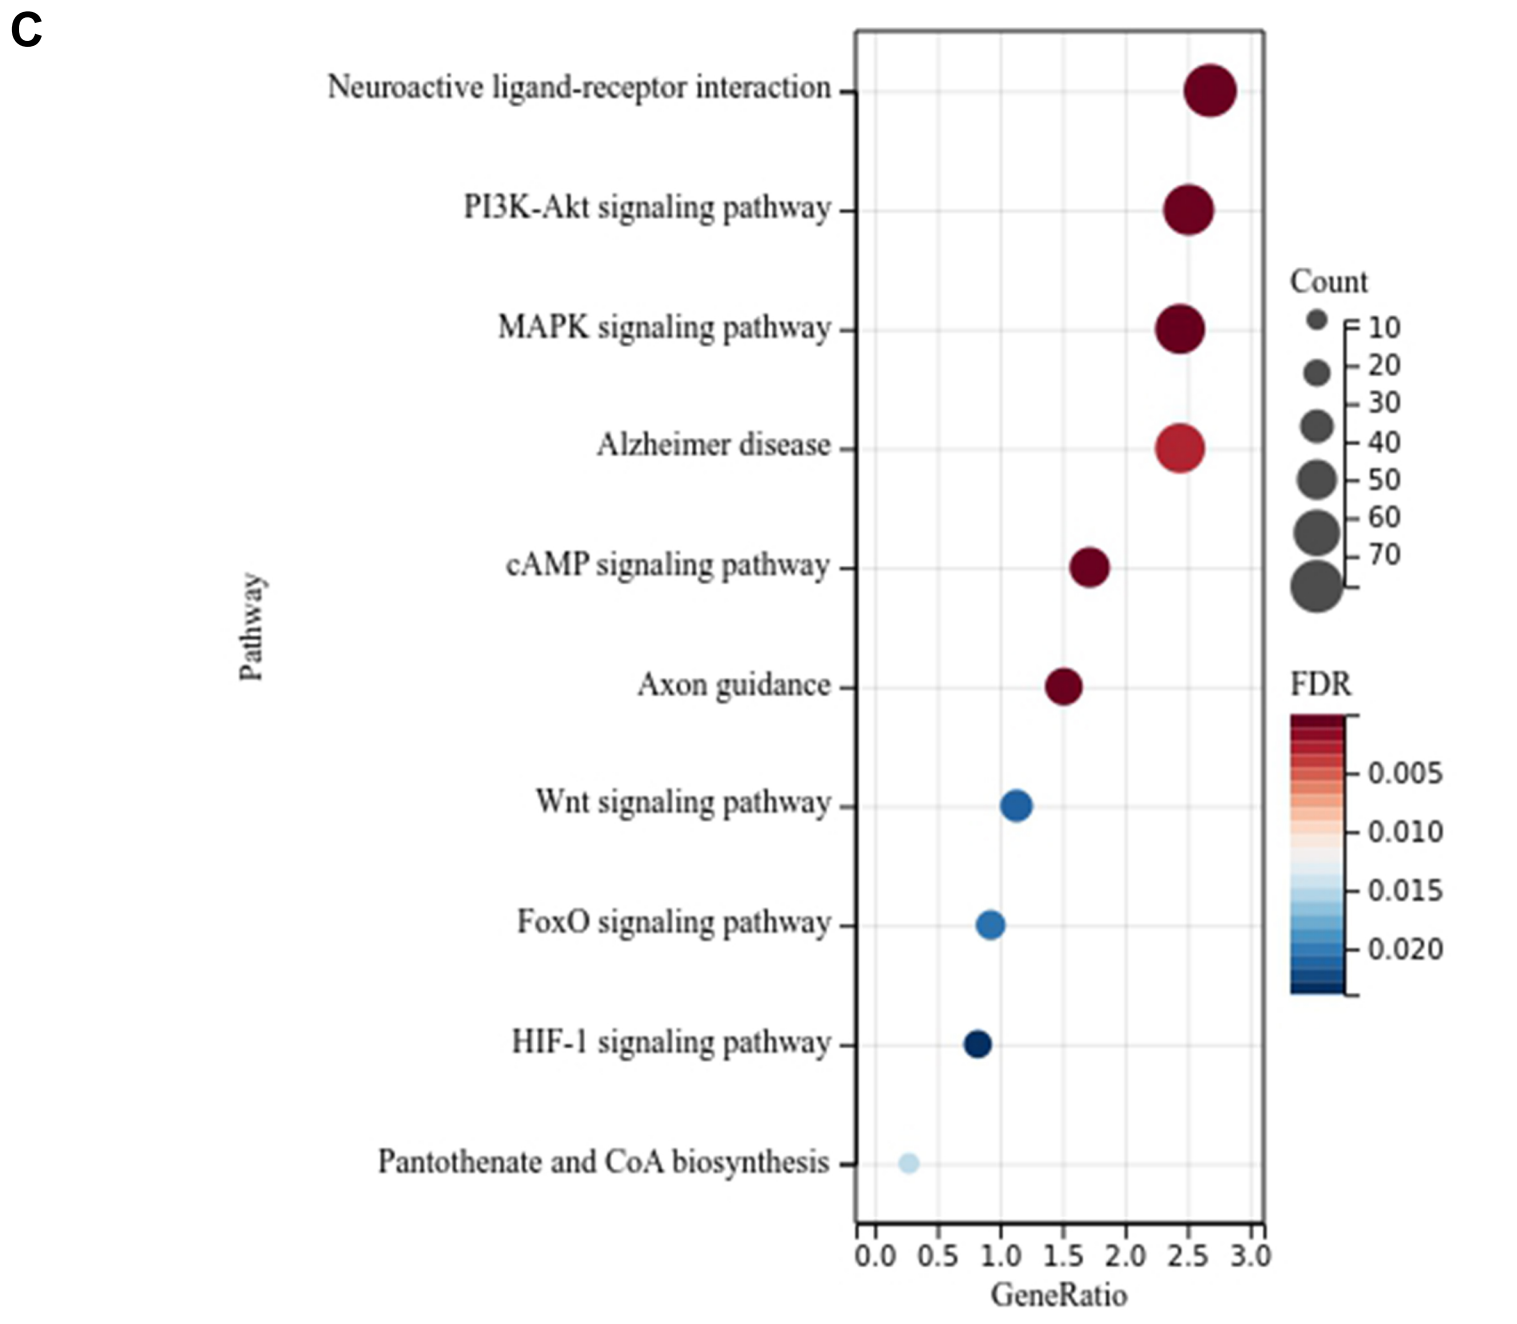

Supplement: f1 [file 9399658.f1.zip › Figure S3.pdf]

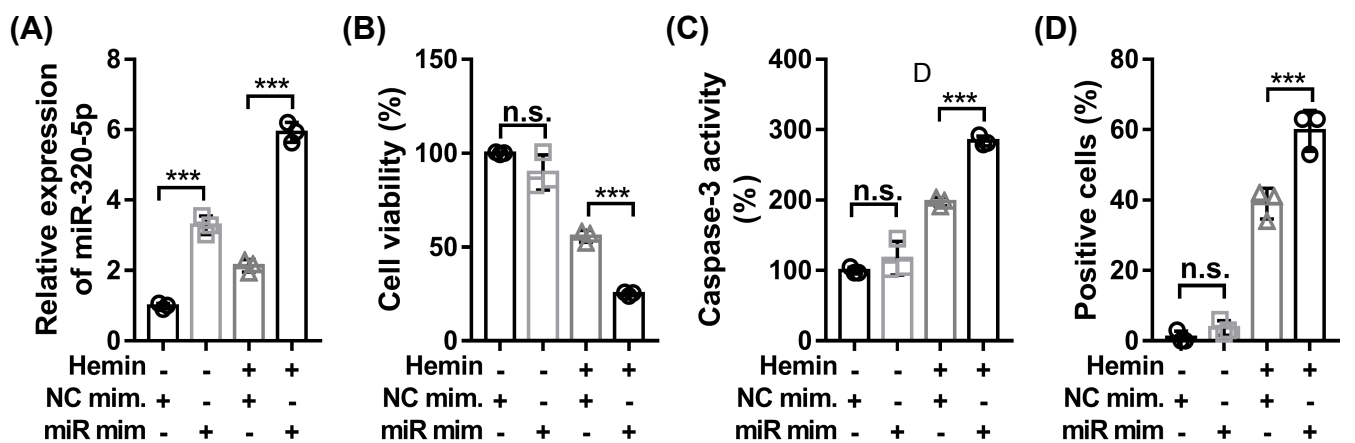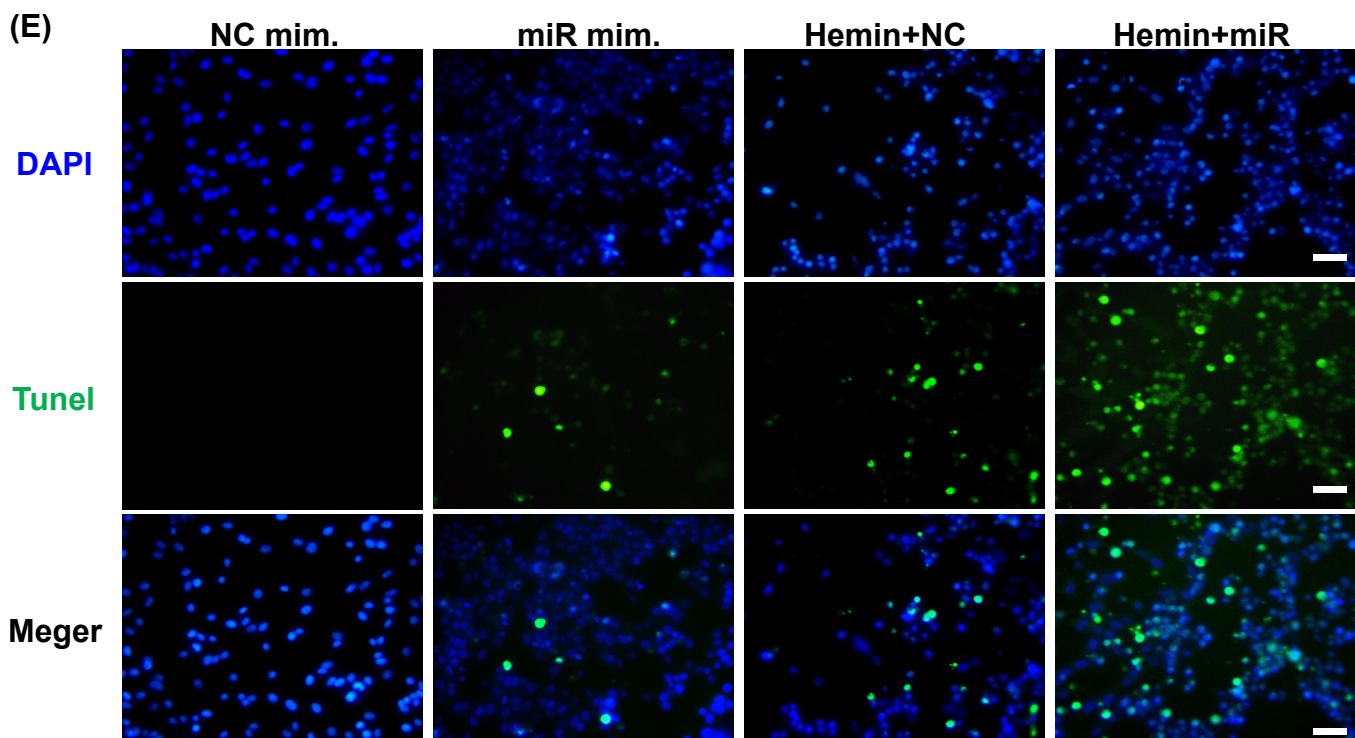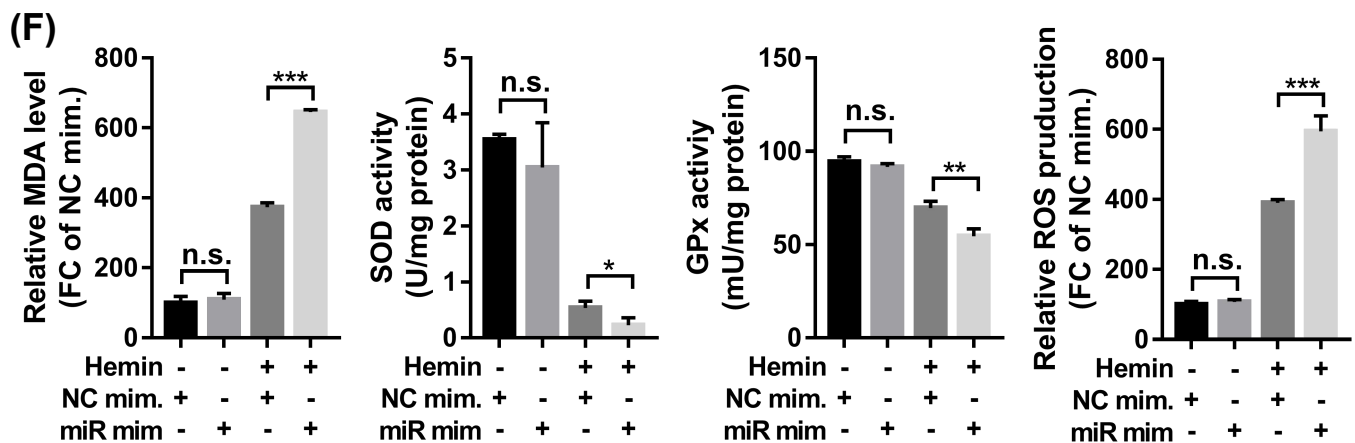

Supplement: f1 [file 9399658.f1.zip › Figure S4.pdf]

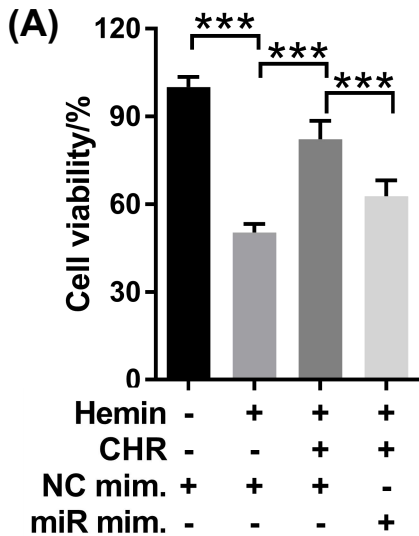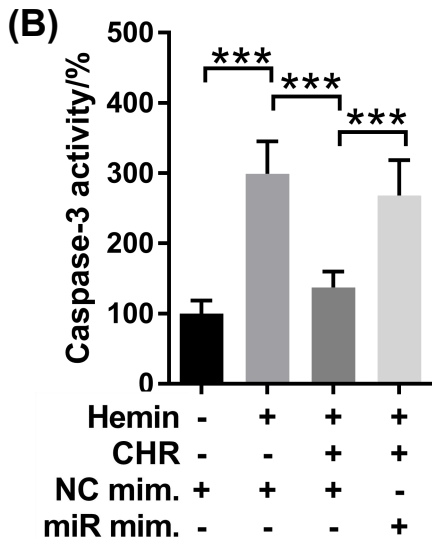

Supplement: f1 [file 9399658.f1.zip › Figure S5.pdf]

**(A)**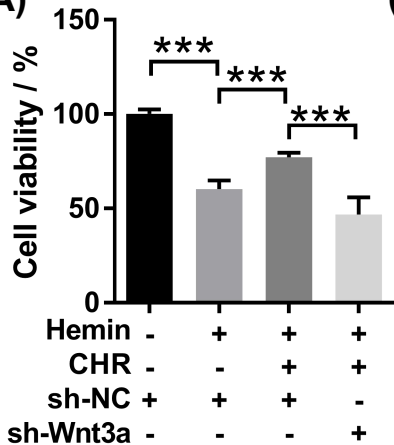**(B)**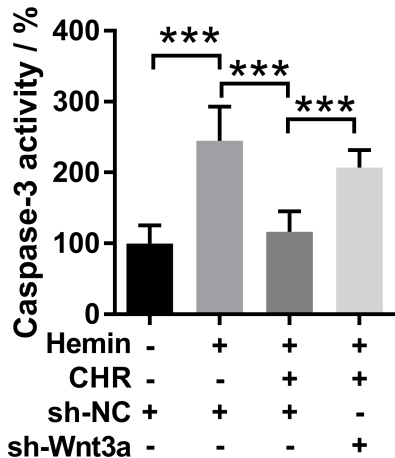

Supplement: f1 [file 9399658.f1.zip › Figure S7.pdf]
